# Supplementary material for: A Novel Design of Tri-Layer Membrane with Controlled Delivery of Paclitaxel and Anti-Biofilm Effect for Biliary Stent Applications
Source: MDPI journal article supplement (doi:10.3390/nano11020486), 2021-02-14
Supplement: s1 [file s1]

# A Novel Design of Tri-Layer Membrane with Controlled Delivery of Paclitaxel and Anti-Biofilm Effect for Biliary Stent Applications

Abdelrahman I. Rezk <sup>1,2,†</sup>, Jeesoo Park <sup>1,2,†</sup>, Joon Yeon Moon <sup>1,2</sup>, Sunny Lee <sup>1,2</sup>, Chan Hee Park <sup>2,3,4,\*</sup> and Cheol Sang Kim <sup>2,3,4,\*</sup>

<sup>1</sup> Department of Bionanosystem Engineering, Graduate School, Jeonbuk National University, Jeonju 561-756, Republic of Korea

<sup>2</sup> Department of Bionanotechnology and Bioconvergence Engineering, Graduate School, Jeonbuk National University, Jeonju 561-756, Republic of Korea

<sup>3</sup> Division of Mechanical Design Engineering, Jeonbuk National University, Jeonju 561-756, Republic of Korea

<sup>4</sup> Eco-Friendly Machine Parts Design Research Center, Jeonbuk National University, Jeonju, Republic of Korea

\*Corresponding authors:

Tel: +82 63 270 4284, Fax: +82 63 270 2460

Cheol Sang Kim ([chskim@jbnu.ac.kr](mailto:chskim@jbnu.ac.kr))

Chan Hee Park ([biochan@jbnu.ac.kr](mailto:biochan@jbnu.ac.kr))

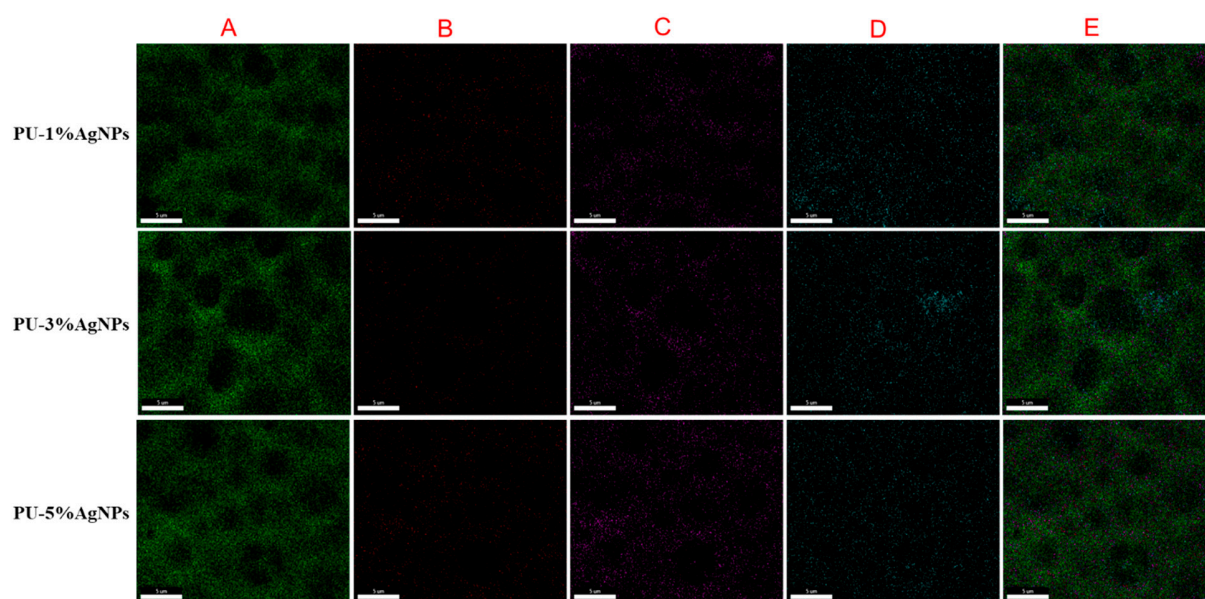

**Figure S1:** EDS elemental mapping showing the composition PU films containing 1, 3, and 5% of AgNPs. A is corresponding to (C), B is corresponding to (N), C is corresponding to (O), D is corresponding to (Ag) and (E) is corresponding to merged image from A to D.

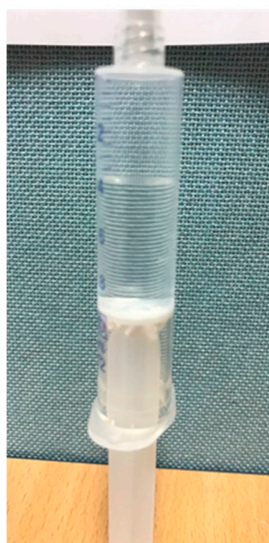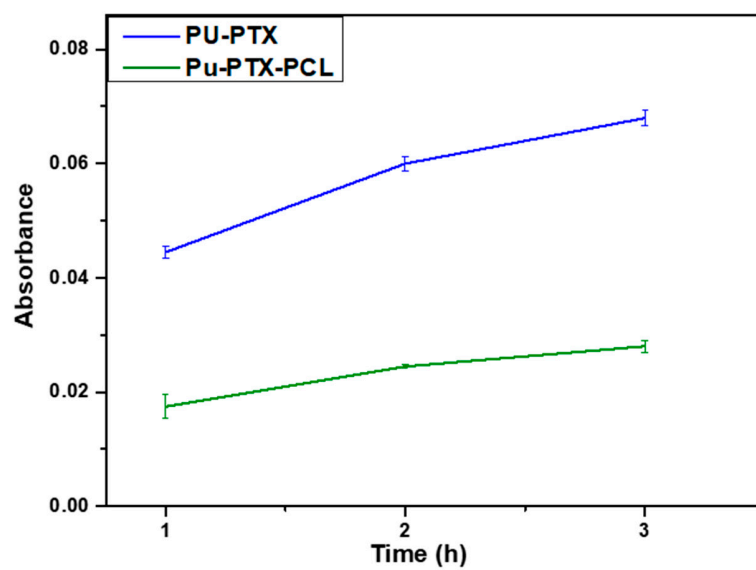

**Figure S2.** The comparison of PTX release behavior between PTX-loaded PU nanofibers enveloped with and without the PCL layer. The release profile confirms that the PCL layer effectively controls the initial burst release.
